# Supplementary material for: Solid-state polymerization of a novel cyanate ester based on 4-tert-butylcalix[6]arene
Source: Royal Society of Chemistry journal article supplement (doi:10.1039/d0py00554a), 2020-01-01
Supplement: d0py00554a1.pdf [file d0py00554a1.pdf]

## *Supporting Information*

# Solid-state polymerization of a novel cyanate ester based on 4-*tert*-butylcalix[6]arene

*Andrey Galukhin,<sup>1\*</sup> Ilya Nikolaev,<sup>1</sup> Roman Nosov,<sup>1</sup> Sergey Vyazovkin<sup>1,2\*</sup>*

<sup>1</sup>Alexander Butlerov Institute of Chemistry, Kazan Federal University, 18 Kremlevskaya Street,  
Kazan 420008, Russian Federation

<sup>2</sup>Department of Chemistry, University of Alabama at Birmingham, 901 S. 14th Street,  
Birmingham, AL 35294

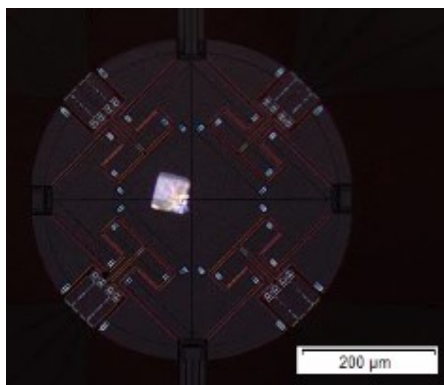

**Figure S1.** Single crystal of cyanate ester monomer placed on surface of MultiSTAR UFS 1 MEMS chip sensor in polarized light.

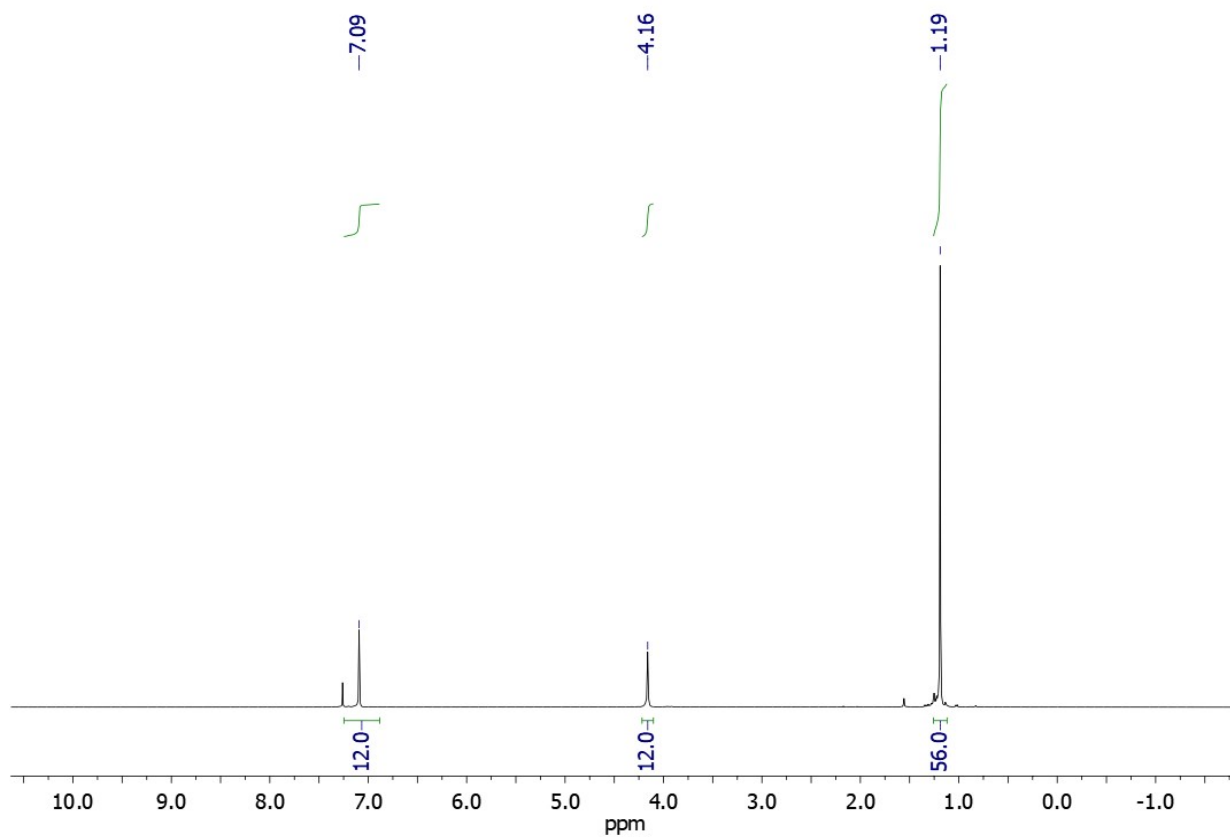

**Figure S2.** NMR <sup>1</sup>H spectrum of cyanate ester monomer.

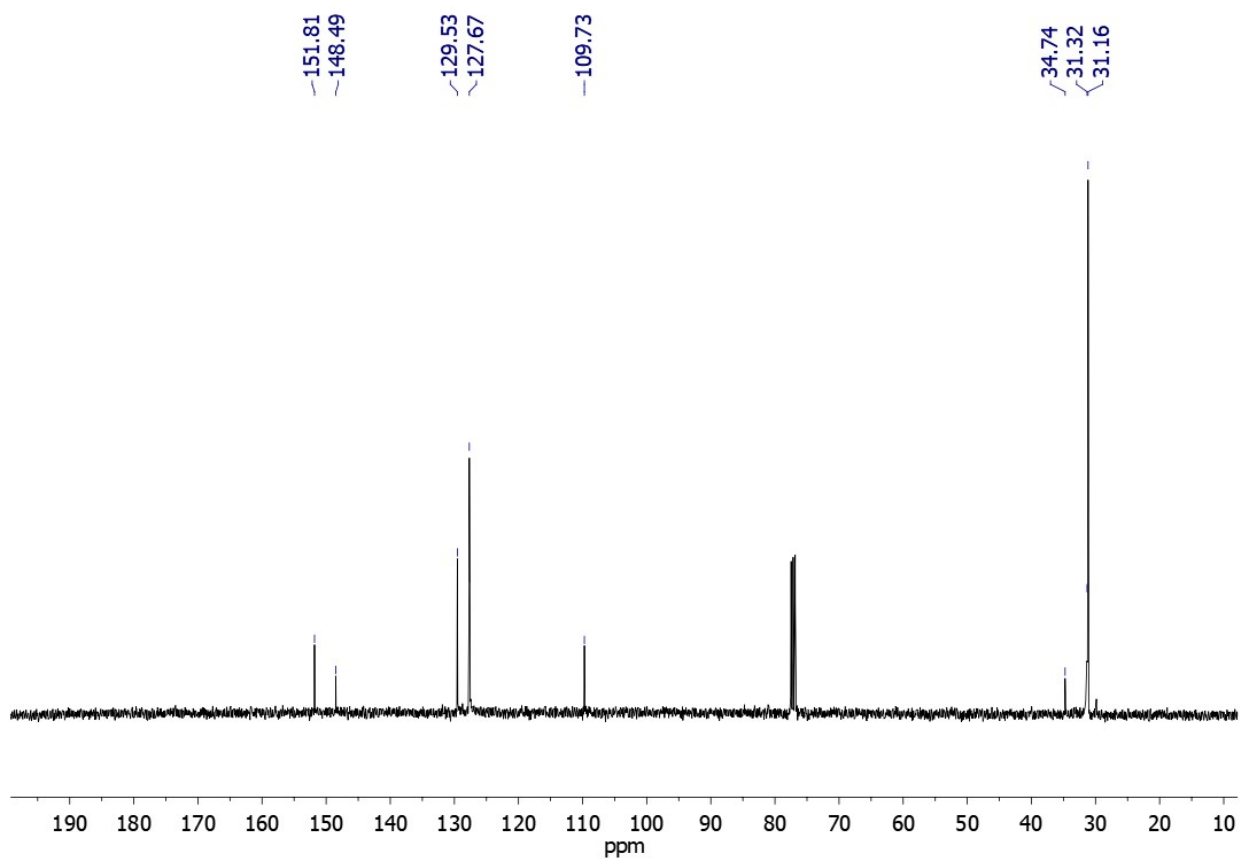

**Figure S3.** NMR  $^{13}\text{C}$  spectrum of cyanate ester monomer.

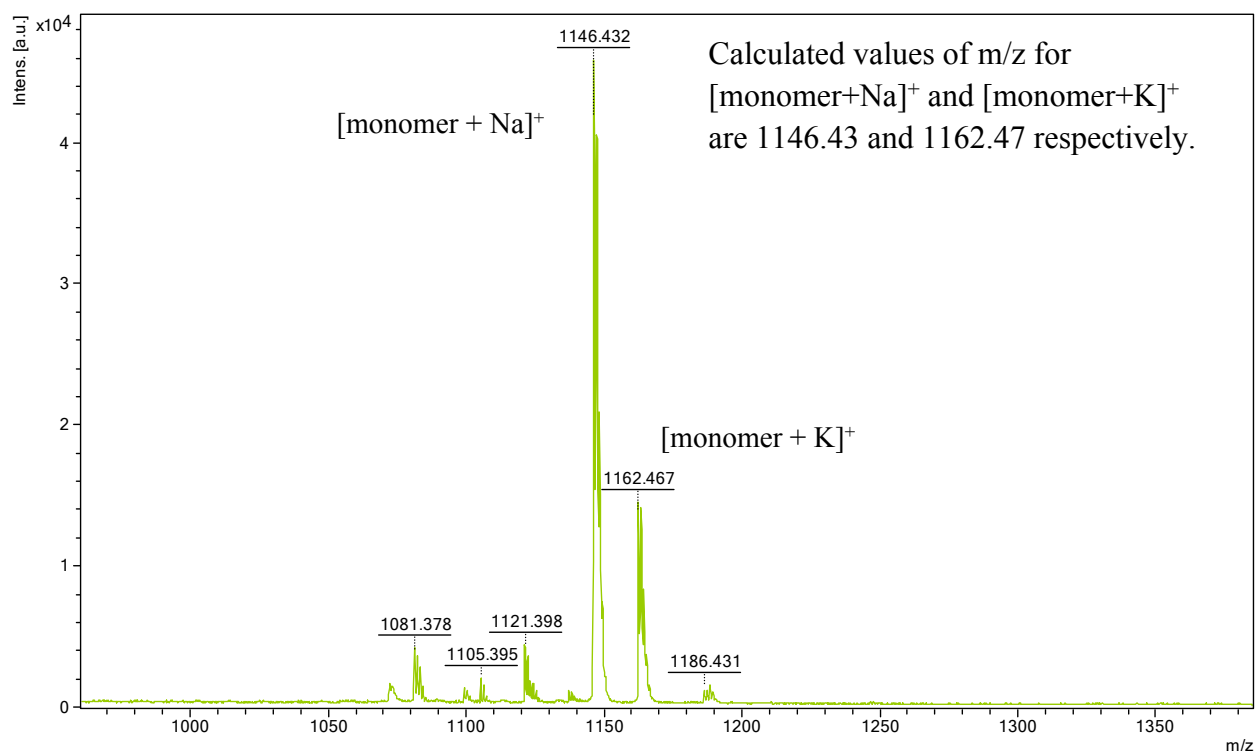

**Figure S4.** MALDI mass spectrum of cyanate ester monomer.

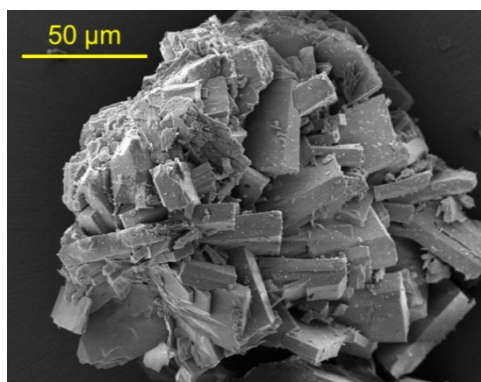

**Figure S5.** SEM image of cyanate ester monomer aggregated crystals.

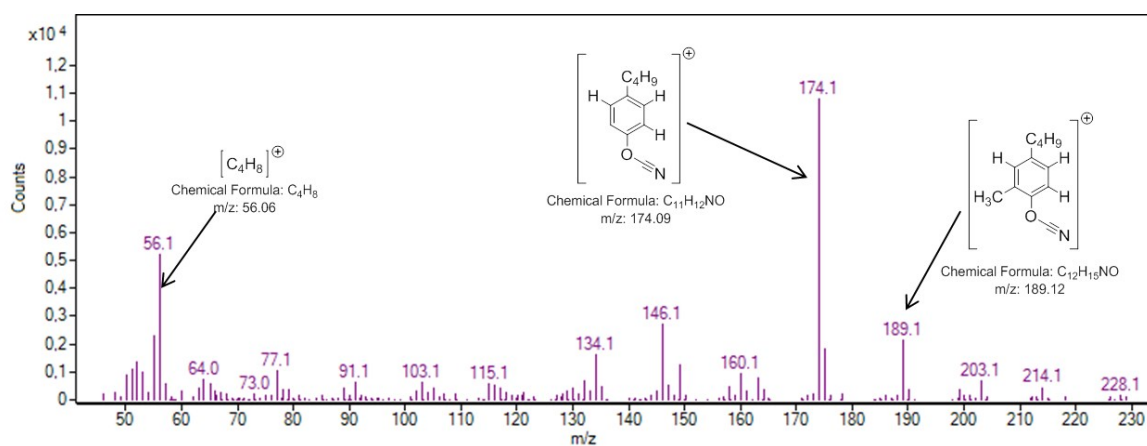

**Figure S6.** Mass-spectrum of gas mixture evolved during polymerization of cyanate ester monomer.

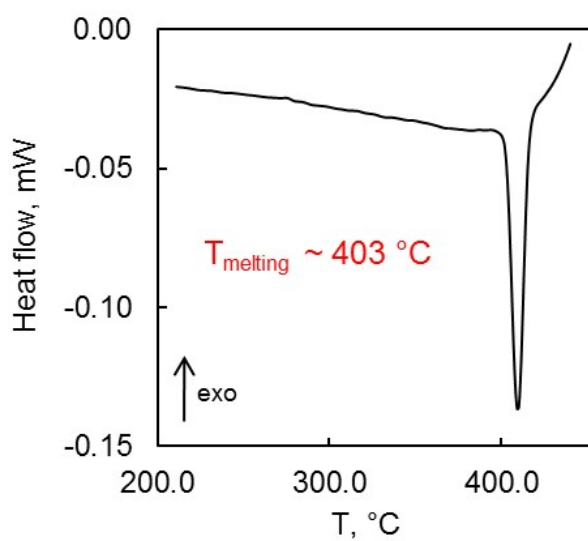

**Figure S7.** FSC curve of the cyanate ester monomer melting obtained at  $6\,000^{\circ}C\,min^{-1}$ .

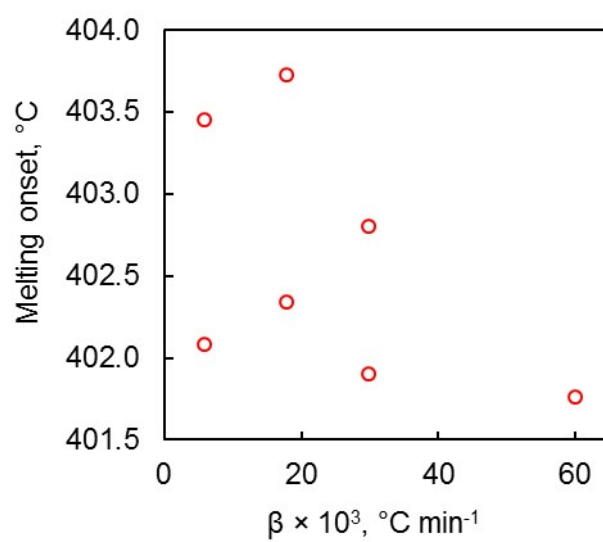

**Figure S8.** Variation of melting onset temperatures of cyanate ester monomer with heating rates.
